# Supplementary material for: Investigation on the enhanced catalytic activity of a Ni-promoted Pd/C catalyst for formic acid dehydrogenation: effects of preparation methods and Ni/Pd ratios
Source: Royal Society of Chemistry journal article supplement (doi:10.1039/c7ra13150j), 2018-01-01
Supplement: c7ra13150j1.pdf [file c7ra13150j1.pdf]

Supporting information for

**Investigation on the enhanced catalytic activity of Ni-promoted Pd/C catalyst for formic acid dehydrogenation: Effects of preparation methods and Ni/Pd ratios**

Yongwoo Kim, Jonghyun Kim and Do Heui Kim<sup>\*a</sup>

<sup>a</sup> School of Chemical and Biological Engineering, Institute of Chemical Processes, Seoul National University, 1 Gwanak-ro, Gwanak-gu, Seoul, Korea

\* Corresponding author: [dohkim@snu.ac.kr](mailto:dohkim@snu.ac.kr)

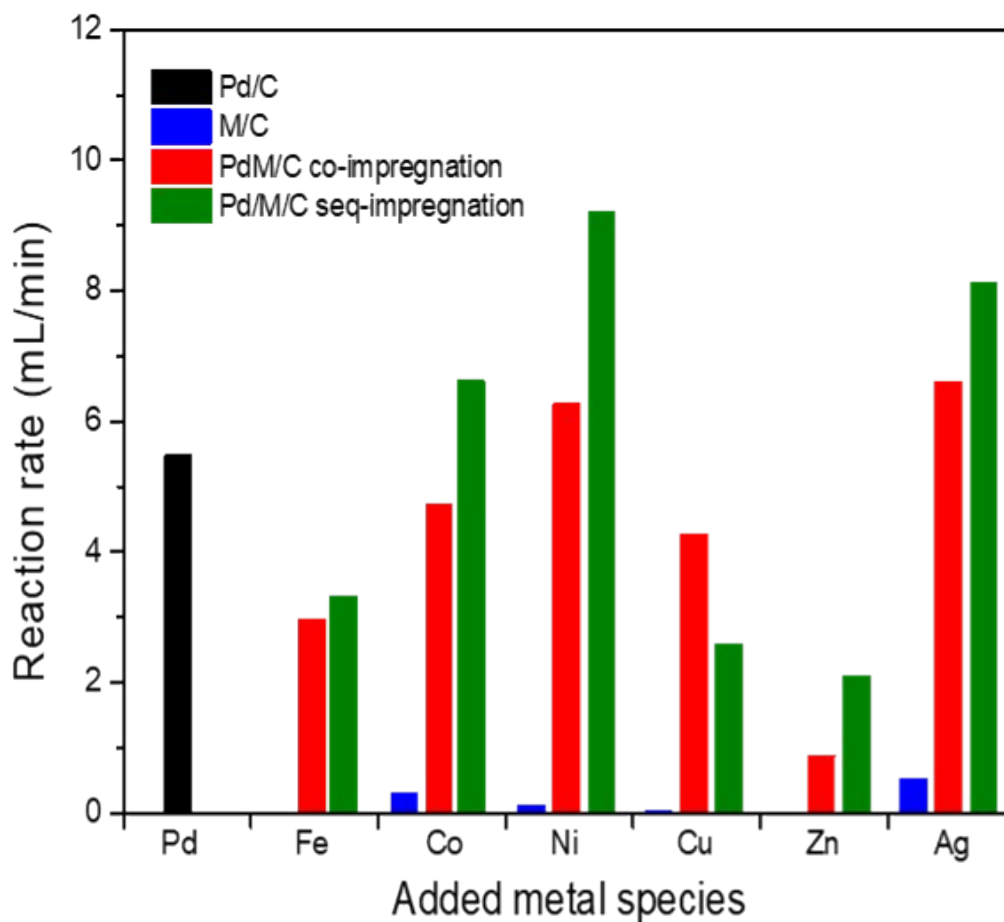

**Figure S1.** Initial rates at first 30 min during the reaction of 10 mL formic acid (1 M) at 60 °C over the various catalysts (0.05 g) prepared by two preparation methods with nominally 10 wt% Pd and 5 wt% metal.

Several metals were chosen to screen promoting metal, and they were impregnated with Pd on carbon by applying two different impregnation methods; co-impregnation and sequential impregnation. As nickel represented the best promoting effect, Ni-promoted catalysts were investigated in our research.

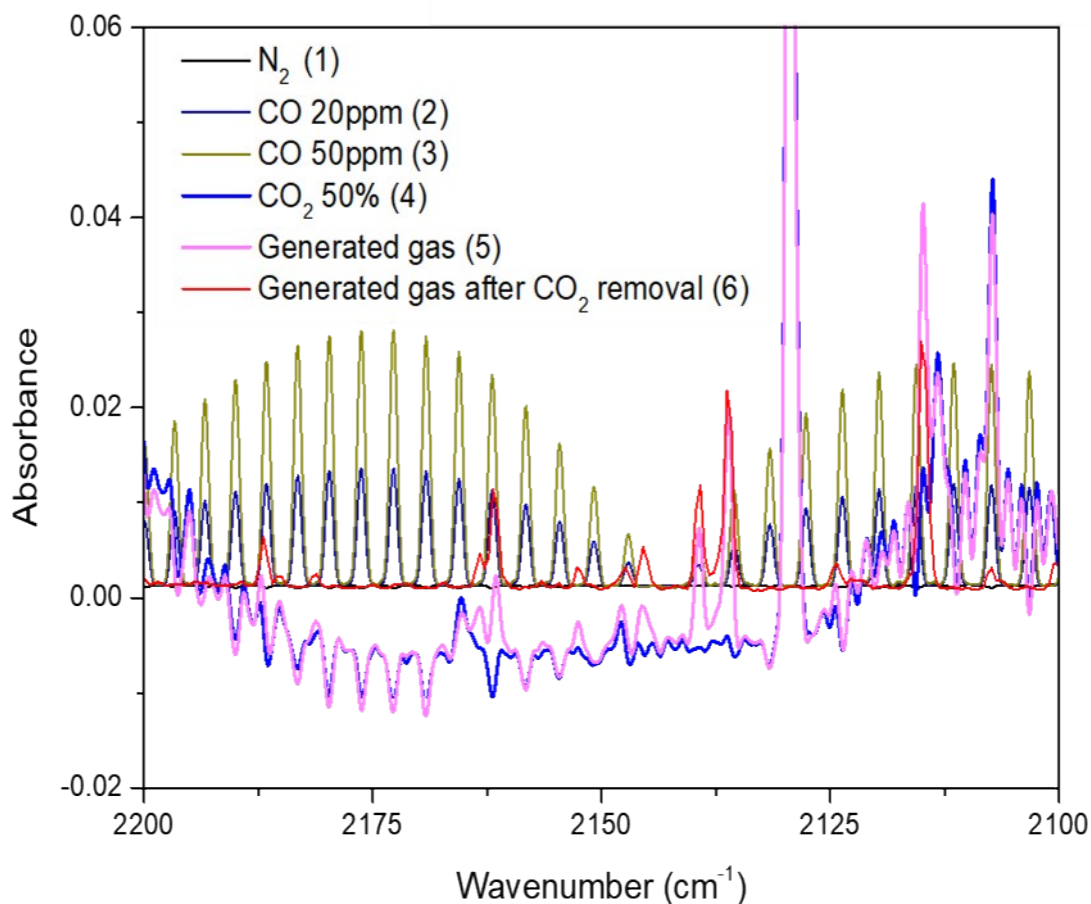

**Figure S2.** FT-IR spectra of N<sub>2</sub> gas, reference CO gas (20 ppm and 50 ppm CO balanced with N<sub>2</sub>), reference CO<sub>2</sub> gas (50 vol% balanced with N<sub>2</sub>) and generated gas (with or without removal of CO<sub>2</sub> by NaOH treatment) from formic acid decomposition reaction over Pd<sub>1</sub>/NiO<sub>1.3</sub>/C (seq) catalyst.

The generated gas without NaOH treatment was analyzed, and the result is shown in Figure S2 as pink line (5). Though the base line of IR was deviated from zero intensity due to the high sensitivity of FT-IR analyzer to such a high content of CO<sub>2</sub> (~50%), the difference between reference gas of 50% CO<sub>2</sub> (blue line (4)) and the generated gas (pink line (5)) is hardly seen in the range of 20 ppm CO (navy line (2)). Hence it can be concluded that there is none of CO (much less than 20 ppm) in the generated gas. The additional analysis was performed for the generated gas after the NaOH treatment to show the result more clearly with a flat baseline. The result of NaOH treated gas also confirms that there is no dehydration reaction to produce CO during the formic acid decomposition reaction.

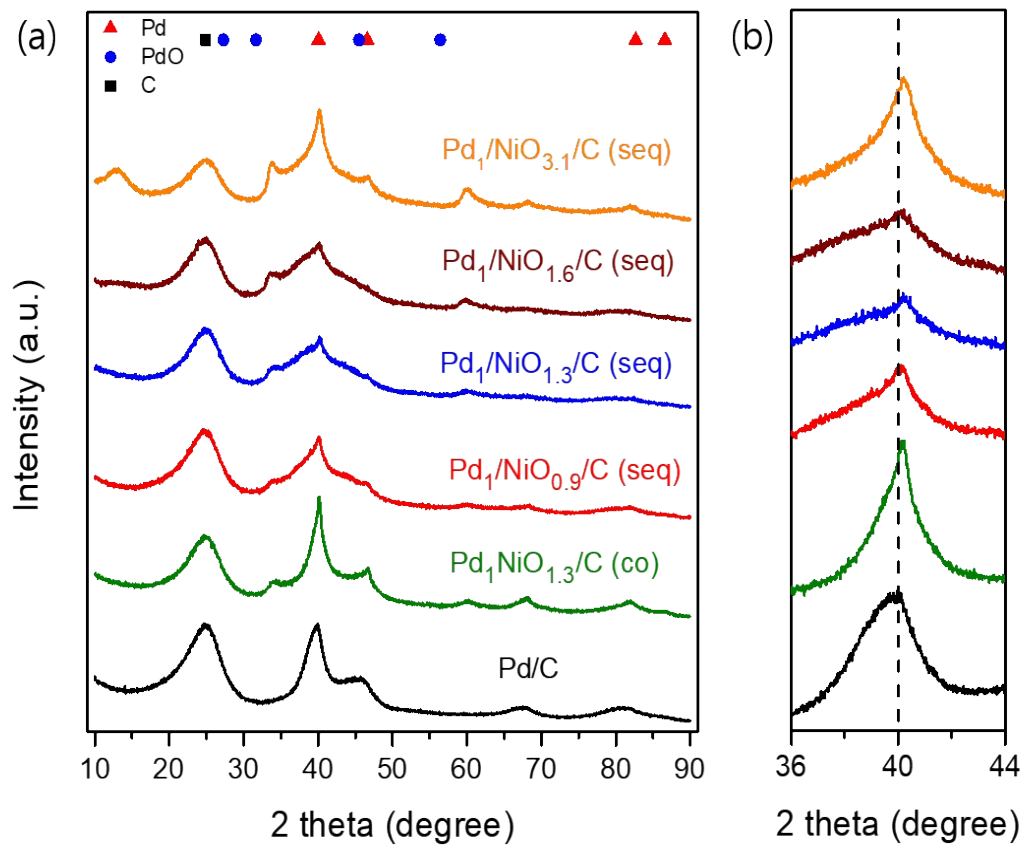

**Figure S3.** (a) X-ray diffraction patterns and (b) zoomed-in patterns at around 40 ° of various Pd-NiO/C catalysts.

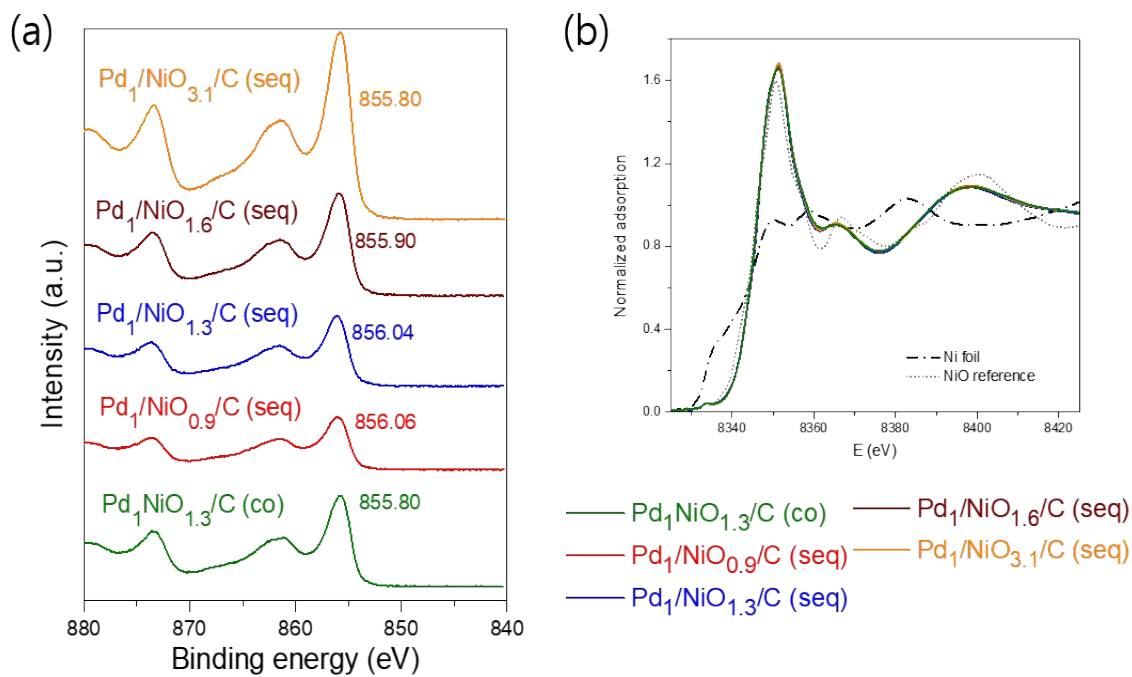

**Figure S4.** (a) XP spectra in Ni 2p region of Pd-NiO/C catalysts and (b) Normalized XANES spectra for Ni K-edges of Pd-NiO/C catalysts with references (i.e. Ni foil and NiO reference)

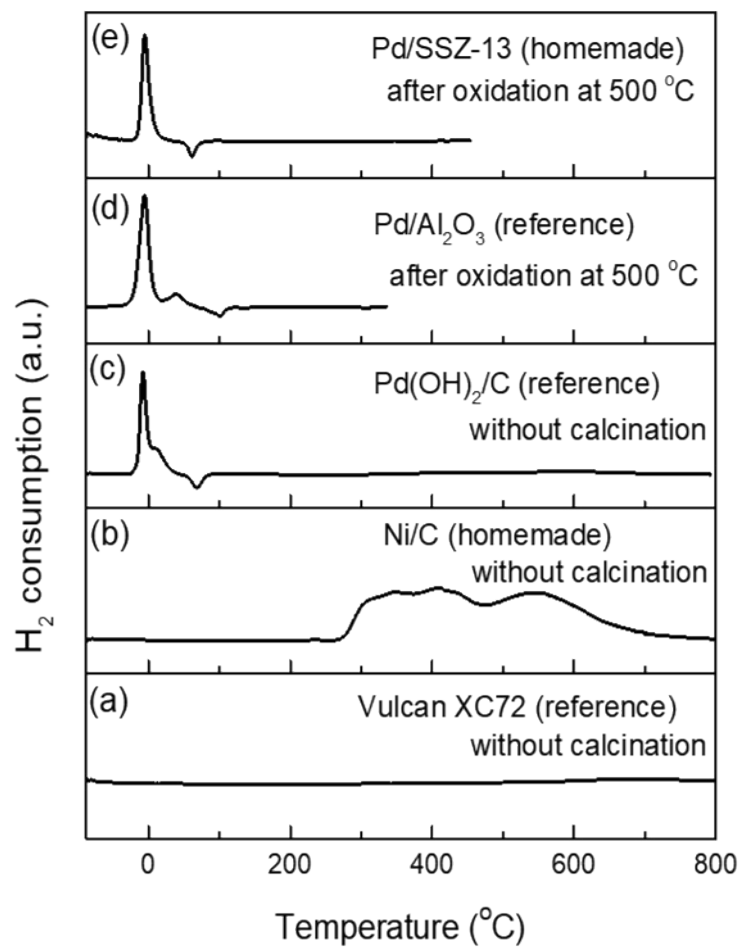

**Figure S5.** Cryogenic H<sub>2</sub>-TPR spectra of (a) Vulcan XC72 (reference), (b) Ni/C (homemade) and (c) Pd(OH)<sub>2</sub>/C (reference) without calcination, and (d) Pd/Al<sub>2</sub>O<sub>3</sub> (reference) and (e) Pd/SSZ-13 (homemade) after calcination under oxidative condition at 500 °C for 2 h.

(a) Reduction of  $\text{Pd}^{2+}$  by  $\text{NaBH}_4$

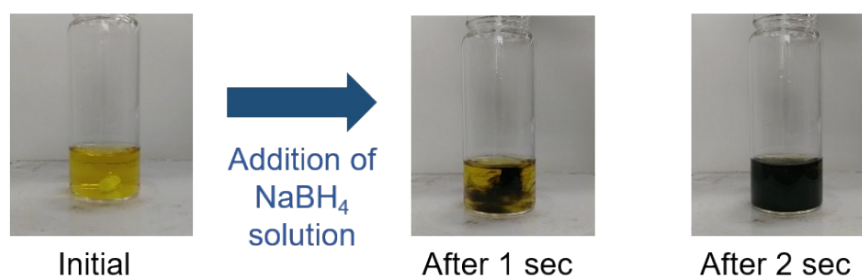

(b) Reduction of 10 wt% of  $\text{NiO}$  on  $\text{Al}_2\text{O}_3$  by  $\text{NaBH}_4$

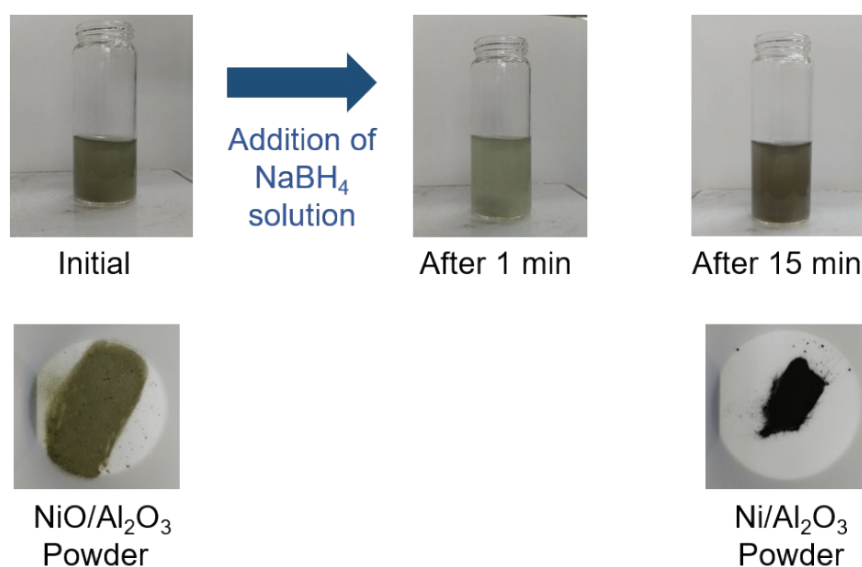

**Figure S6.** Time-dependent changes in color of (a)  $\text{Pd}^{2+}$  and (b)  $\text{NiO}/\text{Al}_2\text{O}_3$  after addition of  $\text{NaBH}_4$  solution

Although both  $\text{Pd}^{2+}$  and  $\text{NiO}$  can be reduced by  $\text{NaBH}_4$ , the reduction of  $\text{Pd}^{2+}$  occurs much faster than reduction of  $\text{NiO}$ . In order to indirectly compare the reduction rate by observing changes in the color of solution,  $\text{Pd}^{2+}$  solution and  $\text{NiO}$  on alumina (10 wt% of  $\text{Ni}$ ) solution were prepared, and then reduced by  $\text{NaBH}_4$  solution. The reduction of  $\text{Pd}^{2+}$  was completed within a couple of seconds as represented in Figure S7(a). In contrast, the reduction of  $\text{NiO}$  on alumina took more than 1 min as shown in Figure S7(b). Therefore, when preparing  $\text{Pd}_1/\text{NiO}_x/\text{C}$  (seq) catalyst,  $\text{Pd}^{2+}$  might be rapidly reduced by  $\text{NaBH}_4$  before the reduction of  $\text{NiO}$ .

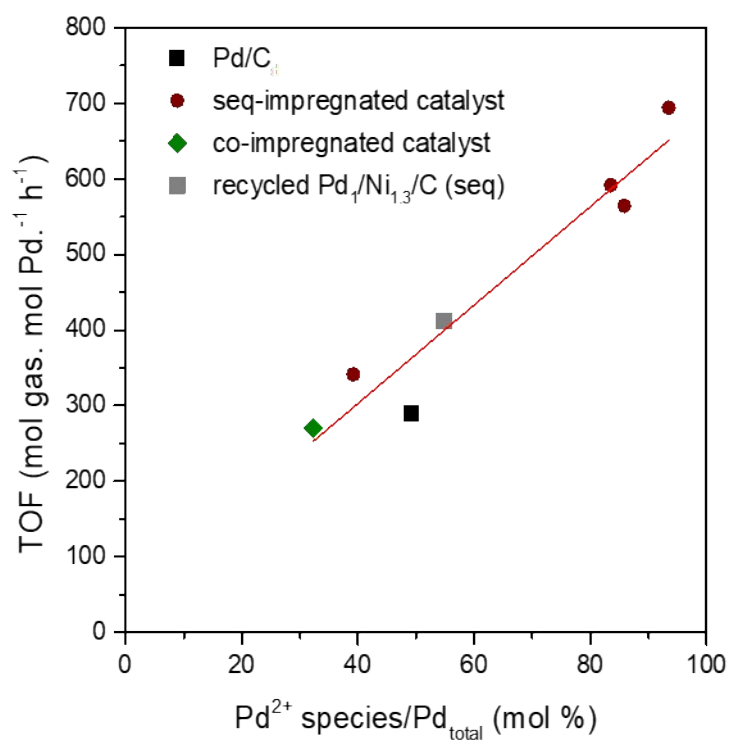

**Figure S7.** The correlation between Pd<sup>2+</sup> species/Pd<sub>total</sub> (mol %) and the TOF (mol gas · mol Pd<sup>-1</sup> · h<sup>-1</sup>) of the catalysts same as Figure 7 in manuscript with the point of recycled Pd<sub>1</sub>/NiO<sub>1.3</sub>/C (seq) catalyst (gray square).
